# Supplementary material for: A novel role for 12/15-lipoxygenase in regulating autophagy
Source: PubMed Central journal article supplement (PMC4309860; doi:10.1016/j.redox.2014.11.005), 2014-12-03
Supplement: mmc2.pdf [file mmc2.pdf]

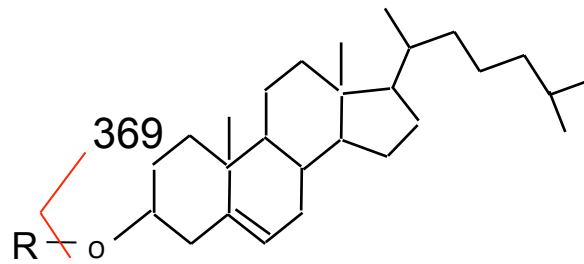

R=

|         |                      |
|---------|----------------------|
| 16:0-   | $[M+NH_4]^+ = 642.8$ |
| 16:1-   | $[M+NH_4]^+ = 640.8$ |
| 18:0-   | $[M+NH_4]^+ = 670.8$ |
| 18:1-   | $[M+NH_4]^+ = 668.8$ |
| 18:2-   | $[M+NH_4]^+ = 666.8$ |
| 18:2OH- | $[M+NH_4]^+ = 682.8$ |
| 20:4-   | $[M+NH_4]^+ = 690.8$ |
| 20:4OH- | $[M+NH_4]^+ = 706.8$ |
| 22:6-   | $[M+NH_4]^+ = 714.8$ |
| 22:6OH- | $[M+NH_4]^+ = 730.8$ |

**Scheme 1. Structures and *m/z* of cholesterol esters**
